# Supplementary material
Source: MDPI journal article supplement (https://www.mdpi.com/2073-4395/14/5/1047)
Supplement: s1 [file s1]

# Selenium Treatment Regulated the Accumulation of Reactive Oxygen Species and the Expressions of Related Genes in Postharvest Broccoli

Yaping Liu <sup>1,2,\*</sup>, Wei Wang <sup>1,2</sup>, Gang Ren <sup>1,2</sup>, Yanan Cao <sup>1,2</sup>, Jianbing Di <sup>1,2</sup>, Yu Wang <sup>1,2</sup> and Lixin Zhang <sup>1,2</sup>

<sup>1</sup> College of Food Science and Engineering, Shanxi Agricultural University, Jinzhong, 030800, China

<sup>2</sup> Shanxi Center of Technology Innovation for Storage and Processing of Fruit and Vegetable, Jinzhong, 030800, China

\*Correspondence: liuyaping@sxau.edu.cn; Tel.: +86-139-3549-1091

Table S1. Name and sequence of primers designed for genes related to ROS metabolism.

| Gene            | Primer Sequences (5'-3')                                                   | Gene Bank Accession | Amplicon length |
|-----------------|----------------------------------------------------------------------------|---------------------|-----------------|
| <i>ACT2</i>     | F: 5'-TTCAAGCTGGAGCCAAGAAGGTTC-3'<br>R: 5'-ACGAATGGTGGCAGACAGTTAGTG-3'     | AF044573            | 151             |
| <i>RBOHf</i>    | F: 5'- CGGCGGTTACGGTGAAGAGTTC-3'<br>R: 5'- GGTTGCTGGCTCCACGCTTC-3'         | LOC106318844        | 88              |
| <i>RBOHd</i>    | F: 5'- GTCCACAGCGTCCAGCAAGC-3'<br>R: 5'- CAAGCGTCTTCTTCGTGAGGAGTG-3'       | LOC106306517        | 85              |
| <i>WRKY33</i>   | F: 5'- TGCTCCGACAACAACAACAACAAAC-3'<br>R: 5'- TCCTTTCCTTTGCTCTCGTCCATTG-3' | LOC106337141        | 115             |
| <i>WRKY25-1</i> | F: 5'- TGA CTGCTACGAACAAGACGAAGAC-3'<br>R: 5'- TCGGGAGAGGAGGAGGCTGAG-3'    | LOC106331712        | 114             |
| <i>WRKY25-2</i> | F: 5'- CACCGATCTCCTTGCTTCTTCCG-3'<br>R: 5'- TGAGCCGTCTTGAAC TTGGGTAAAC-3'  | LOC106336759        | 104             |
| <i>WRKY15</i>   | F: 5'- GCTCCGCCGCAGATCCATAAAG-3'<br>R: 5'- GGTGCTTCATGTGCTCAGACTCC-3'      | LOC106339373        | 103             |
| <i>WRKY6</i>    | F: 5'- GGACTCGTTCAGGCGGTTGTTC-3'<br>R: 5'- ACTCGGTTTCAGGGCTTTCTTCAC-3'     | LOC106313108        | 96              |
| <i>CAT</i>      | F: 5'- TGGCAACAACACTCCTGTCTTCTTC-3'<br>R: 5'- TTTGTCTTCGGGTTTCGGCTTCAG-3'  | LOC106311776        | 87              |
| <i>SOD</i>      | F: 5'- CCTCCGTCCACTCTCCGTTCC-3'<br>R: 5'- AGTTACCCTTGAGCACAGCAACAG-3'      | LOC106336916        | 142             |
| <i>APX</i>      | F: 5'- CCACCACCCGAGTCTCTTCC-3'<br>R: 5'- GGAGGAGGAGGAGGAGGAGGAG-3'         | LOC106300129        | 122             |
| <i>POD</i>      | F: 5'- CGAAGCAGTTGTAATGGAGGAGGAG-3'<br>R: 5'- GGTGTTCTTGTGGCGTTTGTAAAGG-3' | LOC106308421        | 124             |

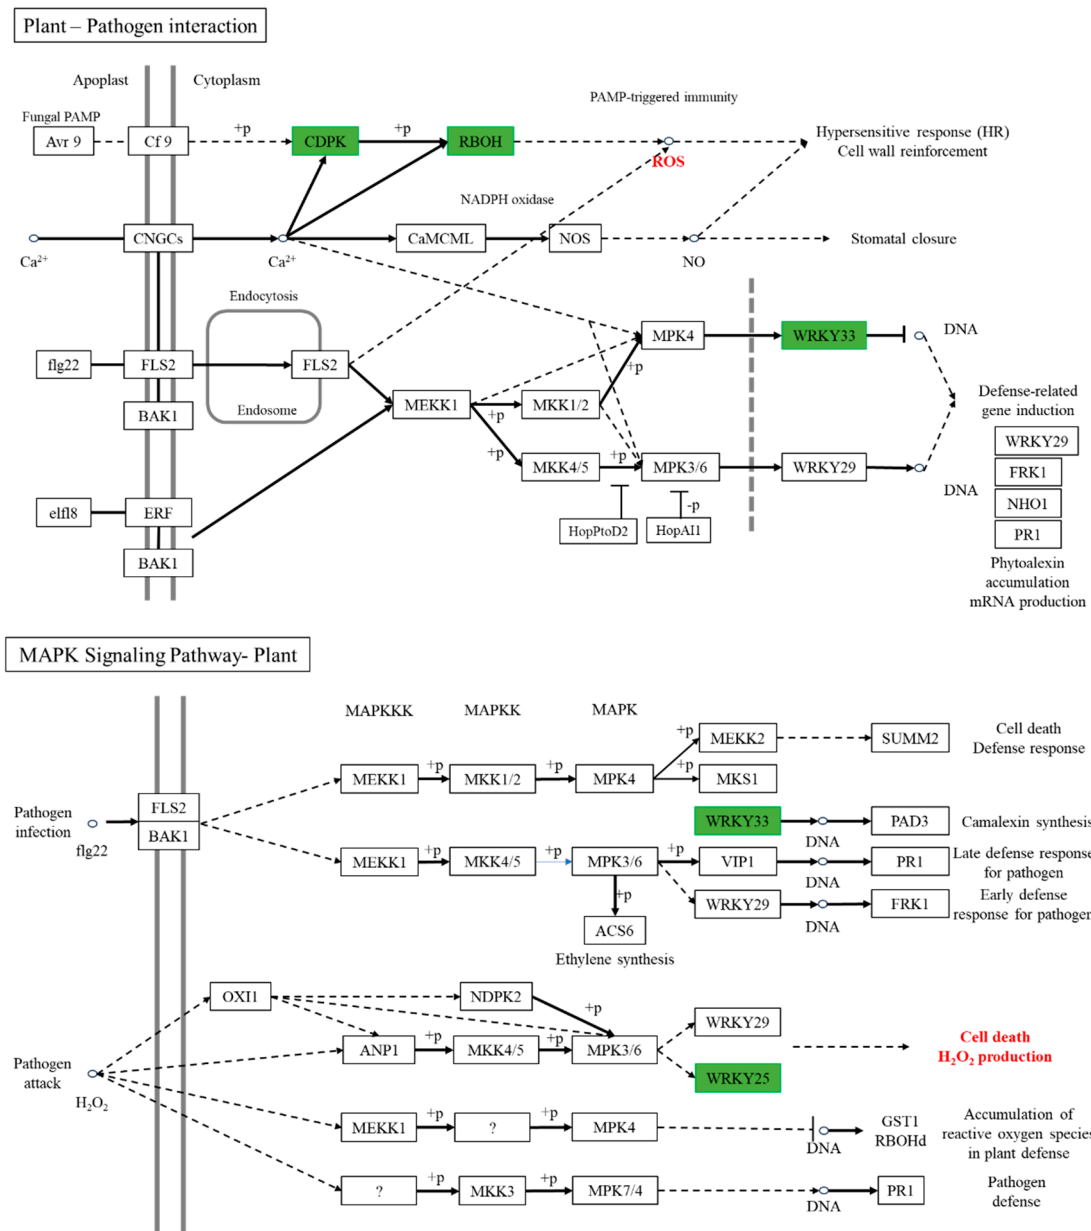

Figure S1. Plant-Pathogen interaction and MAPK signaling pathways

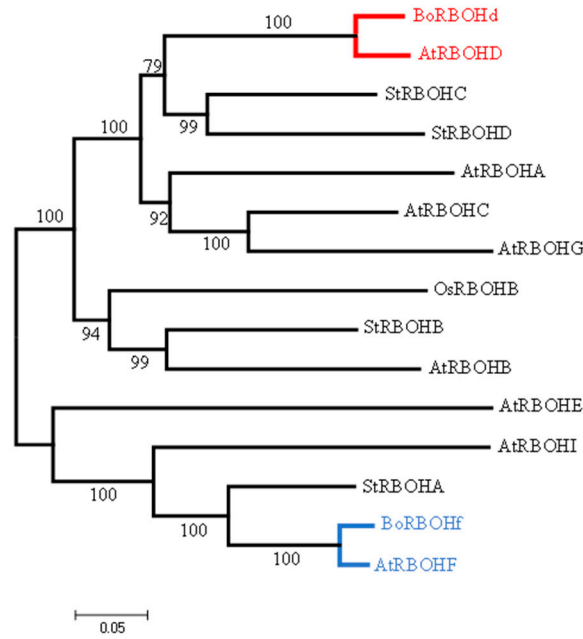

Figure S2. Phylogenetic relationships among *RBOH*s. Phylogenetic tree of *RBOH* sequences of broccoli (*BoRBOH*), Arabidopsis thaliana (*AtRBOH*), Solanum tuberosum (*StRBOH*), and Oryza sativa (*OsRBOH*) based on a conservative approximate alignment method.

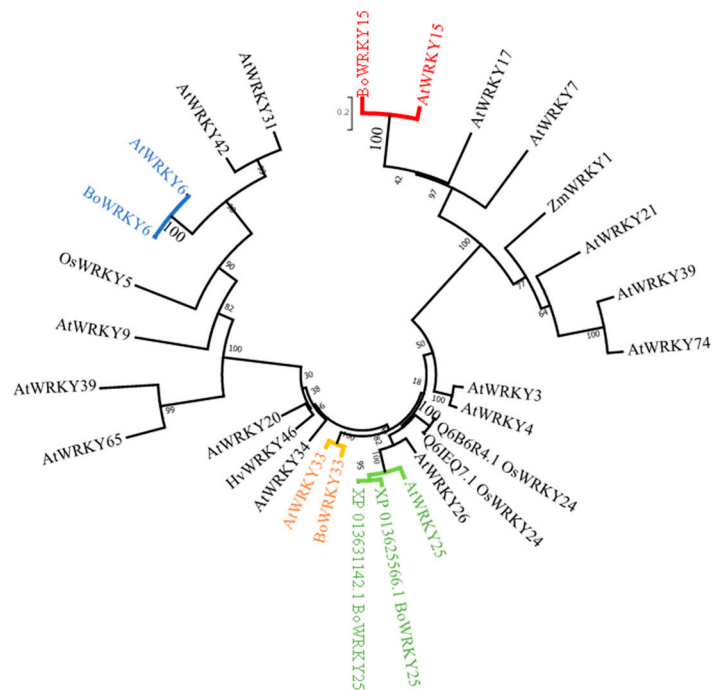

Figure S3. Phylogenetic relationships among *WRKY*s. Phylogenetic tree of *WRKY* sequences of broccoli (*BoWRKY*), Arabidopsis thaliana (*AtWRKY*), Hordeum vulgare (*HvWRKY*), Zea mays (*ZmWRKY*) and Oryza sativa (*OsWRKY*) based on a conservative approximate alignment.
